# Supplementary material for: Bioactive Compounds and Antioxidant Capacity in Pearling Fractions of Hulled, Partially Hull-Less and Hull-Less Food Barley Genotypes
Source: PubMed Central journal article supplement (PMC8001832; doi:10.3390/foods10030565), 2021-03-09
Supplement: foods-10-00565-s001.pdf [file foods-10-00565-s001.pdf]

## Supplementary Materials

# Bioactive compounds and antioxidant capacity in pearling fractions of hulled, partially hull-less and hull-less food barley genotypes

Mariona Martínez-Subirà, María-Paz Romero, Alba Macià, Eva Puig, Ignacio Romagosa and Marian Moralejo \*

AGROTECNIO Center, University of Lleida, Av. Rovira Roure 191, 25198, Lleida, Spain ; mariona.martinez@udl.cat (M.M.S.); mariapaz.romero@udl.cat (M.P.R.); eva.puig@udl.cat (E.P.); alba.macia@udl.cat (A.M.); ignacio.romagosa@udl.cat (I.R.); marian.moralejo@udl.cat (M.M.).

\* Correspondence: marian.moralejo@udl.cat; Tel.: +34-973702858

**Table S1:** Tocopherol and tocotrienol contents pearling fraction of three barley genotypes.

|                   | Tocopherols (T) (µg/g) |   |       |       |      |     |       |     |         |     | Tocotrienols (T3) (µg/g) |   |       |   |      |   |       |   |          |   |
|-------------------|------------------------|---|-------|-------|------|-----|-------|-----|---------|-----|--------------------------|---|-------|---|------|---|-------|---|----------|---|
|                   | α                      |   | β     |       | γ    |     | δ     |     | Total T |     | α                        |   | β     |   | γ    |   | δ     |   | Total T3 |   |
| <b>Kalamalai</b>  |                        |   |       |       |      |     |       |     |         |     |                          |   |       |   |      |   |       |   |          |   |
| F1                | 6.7                    | d | 0.036 | a,b   | 1.37 | d   | 0.028 | c   | 8.1     | d   | 30.4                     | f | 2.24  | f | 15.8 | f | 2.49  | e | 50.9     | f |
| F2                | 21.2                   | c | 0.036 | a,b   | 2.40 | b   | 0.050 | b   | 23.7    | c   | 84.1                     | b | 5.52  | b | 50.8 | b | 4.70  | a | 145.1    | b |
| F3                | 30.1                   | a | 0.041 | a     | 1.01 | e   | 0.081 | a   | 31.2    | a   | 99.8                     | a | 6.65  | a | 61.5 | a | 5.37  | a | 173.3    | a |
| F4                | 30.0                   | a | 0.038 | a,b   | 1.02 | e   | 0.081 | a   | 31.1    | a   | 73.6                     | c | 4.90  | c | 42.4 | c | 4.04  | b | 125.0    | c |
| F5                | 26.6                   | b | 0.034 | b     | 1.01 | e   | 0.078 | a   | 27.7    | b   | 49.7                     | d | 3.47  | d | 27.7 | d | 3.29  | c | 84.2     | d |
| F6                | 25.8                   | b | 0.042 | a     | 4.91 | a   | 0.079 | a   | 30.8    | a   | 35.3                     | e | 2.77  | e | 19.8 | e | 2.77  | d | 60.6     | e |
| F7                | 5.4                    | e | 0.036 | a,b   | 1.53 | c   | 0.028 | c   | 7.0     | e   | 5.3                      | g | 1.68  | g | 3.6  | g | 1.66  | e | 12.2     | g |
| SED               | 0.01                   |   | 0.043 |       | 0.02 |     | 0.026 |     | 0.01    |     | 0.02                     |   | 0.02  |   | 0.02 |   | 0.04  |   | 0.02     |   |
| <b>Hindukusch</b> |                        |   |       |       |      |     |       |     |         |     |                          |   |       |   |      |   |       |   |          |   |
| F1                | 8.3                    | d | 0.027 | c,d   | 1.19 | d   | 0.026 | a,b | 9.5     | d   | 65.1                     | c | 12.23 | c | 38.1 | c | 6.02  | c | 121.4    | c |
| F2                | 18.0                   | c | 0.026 | d     | 1.17 | d   | 0.024 | a,b | 19.2    | c   | 104.6                    | a | 19.95 | a | 61.4 | a | 9.62  | a | 195.5    | a |
| F3                | 27.7                   | a | 0.033 | a,b   | 1.45 | c   | 0.024 | a,b | 29.2    | a,b | 108.3                    | a | 20.70 | a | 62.6 | a | 10.13 | a | 201.7    | a |
| F4                | 29.5                   | a | 0.035 | a     | 1.81 | a,b | 0.026 | a,b | 31.4    | a   | 87.9                     | b | 15.90 | b | 48.2 | b | 7.92  | b | 159.9    | b |
| F5                | 28.1                   | a | 0.036 | a     | 1.96 | a   | 0.025 | a,b | 30.2    | a   | 57.6                     | c | 9.89  | d | 30.0 | d | 5.13  | d | 102.7    | d |
| F6                | 23.9                   | b | 0.029 | b,c,d | 1.67 | b   | 0.033 | a   | 25.7    | b   | 27.7                     | d | 4.91  | e | 13.2 | e | 3.13  | e | 49.0     | e |
| F7                | 2.8                    | e | 0.030 | b,c   | 1.03 | e   | 0.016 | b   | 3.9     | e   | 3.1                      | e | 2.12  | f | 2.2  | f | 1.66  | f | 9.1      | f |
| SED               | 0.03                   |   | 0.033 |       | 0.03 |     | 0.136 |     | 0.03    |     | 0.03                     |   | 0.03  |   | 0.03 |   | 0.03  |   | 0.03     |   |
| <b>Annapurna</b>  |                        |   |       |       |      |     |       |     |         |     |                          |   |       |   |      |   |       |   |          |   |

---

|     |      |   |       |   |      |     |       |   |      |   |       |   |       |     |      |   |      |     |       |   |
|-----|------|---|-------|---|------|-----|-------|---|------|---|-------|---|-------|-----|------|---|------|-----|-------|---|
| F1  | 19.4 | a | 0.040 | a | 2.03 | b   | 0.048 | a | 21.5 | a | 114.5 | a | 14.81 | a   | 35.6 | a | 5.07 | a,b | 170.0 | a |
| F2  | 23.8 | a | 0.037 | a | 2.75 | a,b | 0.055 | a | 26.6 | a | 131.2 | a | 17.92 | a   | 40.1 | a | 5.73 | a   | 195.0 | a |
| F3  | 24.8 | a | 0.042 | a | 3.20 | a   | 0.058 | a | 28.1 | a | 93.4  | a | 12.28 | a,b | 25.9 | a | 4.26 | b   | 135.9 | a |
| F4  | 23.4 | a | 0.040 | a | 3.25 | a   | 0.057 | a | 26.7 | a | 58.1  | b | 7.52  | b,c | 14.9 | b | 3.13 | c   | 83.7  | b |
| F5  | 21.8 | a | 0.041 | a | 3.12 | a,b | 0.058 | a | 25.0 | a | 38.8  | b | 5.20  | c   | 9.6  | b | 2.57 | c   | 56.2  | b |
| F6  | 25.3 | a | 0.046 | a | 3.46 | a   | 0.061 | a | 28.3 | a | 39.2  | b | 5.78  | c   | 9.4  | b | 2.55 | c   | 57.0  | b |
| F7  | 3.8  | b | 0.038 | a | 1.16 | c   | 0.021 | b | 5.1  | b | 6.3   | c | 2.18  | d   | 2.1  | c | 1.61 | d   | 12.2  | c |
| SED | 0.11 |   | 0.060 |   | 0.11 |     | 0.088 |   | 0.11 |   | 0.11  |   | 0.13  |     | 0.13 |   | 0.06 |     | 0.11  |   |

Results are presented as the mean. Means within a column followed by different letters indicate significant differences on log-transformed data; (Tukey-Kramer's HSD for  $\alpha=0.05$ ).  
 SED: standard error of the difference between means.

**Table S2.** Anthocyanin contents ( $\mu\text{g/g}$ ) in the pearling fractions of the partially-hull-less and purple genotype.

|                                 | F1     | F2 | F3     | F4 | F5     | F6 | F7    | SED |       |    |       |    |      |   |      |
|---------------------------------|--------|----|--------|----|--------|----|-------|-----|-------|----|-------|----|------|---|------|
| Pelargonidin glucoside          | 4.55   | a  | 5.48   | a  | 2.77   | b  | 1.14  | c   | 0.58  | d  | 0.31  | e  | 0.11 | e | 0.08 |
| Pelargonidin acetylglucoside    | 0.10   | a  | 0.12   | a  | 0.08   | a  | 0.03  | b   |       |    |       |    |      |   | 0.12 |
| Carboxypyranopelargonidin glu   | 0.25   | ab | 0.28   | a  | 0.15   | b  | 0.08  | c   | 0.04  | d  | 0.03  | d  | 0.01 | e | 0.17 |
| Pelargonidin malonylglucoside   | 23.18  | a  | 28.40  | a  | 14.68  | b  | 5.55  | c   | 2.59  | d  | 1.58  | e  | 0.59 | f | 0.10 |
| Pelargonidin dimalonylglucoside | 12.63  | a  | 15.37  | a  | 7.35   | b  | 2.83  | c   | 1.38  | d  | 0.80  | e  | 0.35 | f | 0.13 |
| Cyanidin arabinoside            | 0.19   | a  | 0.24   | a  | 0.14   | b  | 0.05  | c   | 0.03  | d  |       |    |      |   | 0.09 |
| Cyanidin glucoside              | 94.90  | a  | 121.81 | a  | 66.00  | b  | 25.64 | c   | 11.69 | d  | 7.07  | e  | 2.30 | f | 0.08 |
| Cyanidin acetylglucoside        | 2.04   | a  | 2.42   | a  | 1.36   | b  | 0.53  | c   | 0.25  | d  | 0.17  | e  | 0.04 | f | 0.10 |
| Cyanidin malonylglucoside       | 0.89   | a  | 0.64   | a  | 0.39   | b  | 0.22  | c   | 0.14  | c  | 0.08  | d  | 0.01 | e | 0.13 |
| Cyanidin dimalonylglucoside     | 186.08 | a  | 241.24 | a  | 120.71 | b  | 46.04 | c   | 20.68 | d  | 12.00 | e  | 4.70 | f | 0.09 |
| Peonidin acetylglucoside        | 0.07   | b  | 0.10   | b  | 0.20   | a  |       |     |       |    |       |    |      |   | 0.14 |
| Peonidin malonylglucoside       | 0.28   | a  | 0.28   | a  | 0.18   | a  | 0.18  | a   | 0.15  | a  | 0.07  | b  | 0.01 | c | 0.20 |
| Peonidin dimalonylglucoside     | 5.52   | b  | 21.21  | a  | 0.07   | bc | 0.07  | bc  | 0.03  | bc | 0.02  | bc | 0.01 | c | 0.99 |
| Delphinidin arabinoside         |        |    |        |    |        |    | 0.05  | a   | 0.03  | a  |       |    |      |   | 0.16 |
| Delphinidin glucoside           | 1.91   | a  | 2.94   | a  | 2.15   | a  | 1.49  | a   | 0.53  | b  | 0.26  | b  | 0.08 | c | 0.23 |
| Delphinidin malonylglucoside    | 15.33  | a  | 16.80  | a  | 10.04  | b  | 4.54  | c   | 2.70  | d  | 1.78  | e  | 0.65 | f | 0.09 |
| Delphinidin dimalonylglucoside  | 0.59   | a  | 0.57   | a  | 0.39   | ab | 0.28  | b   | 0.14  | c  | 0.08  | d  | 0.01 | e | 0.13 |
| Petunidin glucoside             | 0.44   | a  | 0.46   | a  | 0.40   | a  | 0.23  | b   | 0.17  | b  |       |    |      |   | 0.05 |
| Petunidin malonylglucoside      | 2.49   | a  | 1.06   | a  | 0.74   | a  | 0.43  | ab  | 0.26  | ab | 0.13  | b  | 0.01 | c | 0.47 |
| Petunidin rutinoside            | 0.15   | ab | 0.19   | a  | 0.18   | a  | 0.14  | ab  | 0.09  | bc | 0.07  | c  | 0.02 | d | 0.17 |
| Petunidin hexoside              | 0.22   | a  | 0.17   | ab | 0.09   | bc | 0.05  | cd  | 0.04  | d  |       |    |      |   | 0.20 |
| Petunidin dimalonylglucoside    | 0.13   | a  | 0.12   | a  | 0.09   | a  | 0.04  | b   | 0.03  | b  |       |    |      |   | 0.01 |
| Malvidin malonylglucoside       | 1.01   | a  | 1.15   | a  | 1.00   | a  | 0.57  | a   | 0.39  | ab | 0.28  | ab | 0.12 | b | 0.44 |
| Malvidin hexoside               | 0.03   | ab | 0.05   | a  | 0.06   | a  | 0.04  | ab  | 0.02  | bc | 0.02  | bc | 0.01 | c | 0.21 |

Results are presented as mean. Means within a rows followed by different letters indicate significant differences on log-transformed data; (Tukey-Kramer HSD for  $\alpha=0.05$ ). SED: standard error of the difference between means.
